# Supplementary material
Source: PubMed Central journal article supplement (PMC6322472)

**Supplementary Figure S1. Maximum parsimony tree built from 5,660 SNP positions of 38 isolates and annotated with the WGS-based phylogenetic classification.**

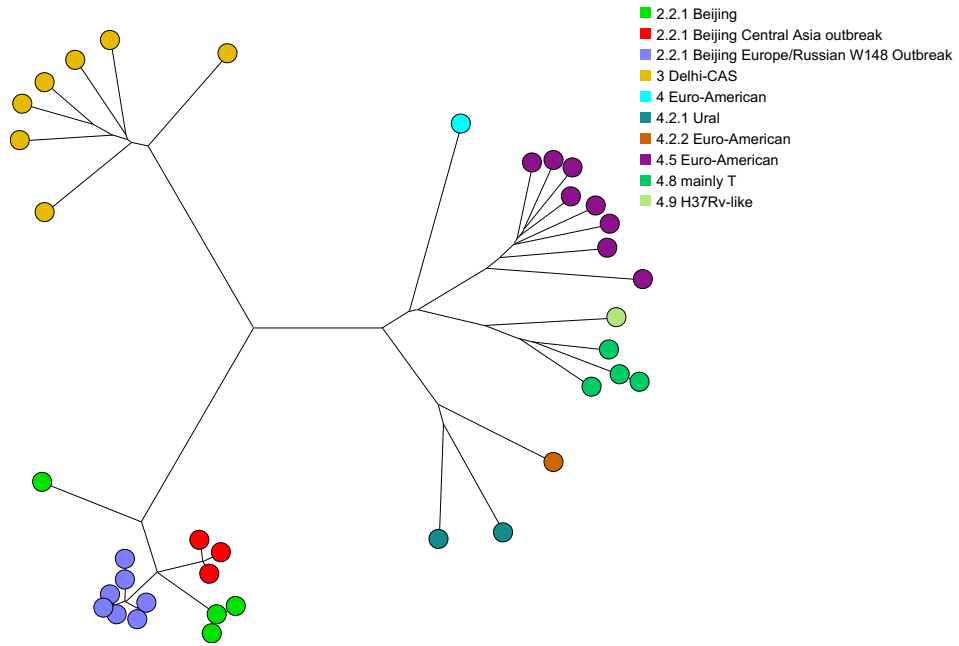

Supplement: d259fcc74e404a9a0081d18a5162c557_JCM.01477-18-s0001.pdf [file d259fcc74e404a9a0081d18a5162c557_JCM.01477-18-s0001.pdf]
